# Supplementary material
Source: PubMed Central journal article supplement (PMC5517344)

A. Early IMRT adoption period

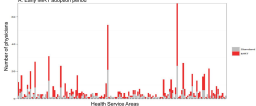

B. Early SBRT adoption period

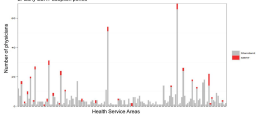

Supplement: NIHMS841401-supplement-01.pdf [file NIHMS841401-supplement-01.pdf]
